# Supplementary material for: Preparation of Chiral Porous Organic Cage Clicked Chiral Stationary Phase for HPLC Enantioseparation
Source: MDPI journal article supplement (doi:10.3390/molecules28073235), 2023-04-04
Supplement: s1 [file s1]

## Supplementary Materials

# Preparation of Chiral Porous Organic Cage Clicked Chiral Stationary Phase for HPLC Enantioseparation

Ya-Nan Gong, Qi-Yu Ma, Ying Wang, Jun-Hui Zhang \*, You-Ping Zhang, Rui-Xue Liang, Bang-Jin Wang \*, Sheng-Ming Xie and Li-Ming Yuan

Department of Chemistry, Yunnan Normal University, Kunming 650500, China

\* Correspondence: zhangjunhui@ynnu.edu.cn (J.-H.Z.);  
wangbangjin@ynnu.edu.cn (B.-J.W.)

## Experimental Section

### 1. Synthesis of 2-Hydroxy-1,3,5-benzenetrialdehyde

2-Hydroxy-1,3,5-benzenetrialdehyde was synthesized by *ortho*- and *para*-regioselective formylation of phenol (Figure S1) [S1]. Briefly, phenol (8.3 g, 88 mmol), HMTA (24.1 g, 171.6 mmol), and TFA (75 mL) were added into a 250 mL round-bottom flask and heated to reflux at 120 °C under nitrogen atmosphere for 12 h. Afterwards, the reaction temperature was increased to 150 °C and refluxed for another 3 h. The mixture was cooled to 120 °C, hydrochloric acid aqueous solution (100 mL, 3 mol L<sup>-1</sup>) was added. The mixture was stirred at 100 °C for 30 min and then cooled to room temperature overnight. The resulting yellowish solids were filtered, washed with ethanol and ultrapure water for several times and then dried in a vacuum oven at 70 °C for 10 h. Finally, the crude product was recrystallized with DMSO to obtain pure product (5.0 g). <sup>1</sup>H NMR (500 MHz, DMSO-d<sub>6</sub>, ppm): δ 10.32 (s, 2H, OH), δ 10.00 (s, 1H, CHO), δ 8.53 (s, 2H, Ar-H); <sup>13</sup>C NMR (125 MHz, DMSO-d<sub>6</sub>, ppm) δ: 192.14, 191.17, 166.74, 137.77, 128.57, 124.75 (Figure S2).

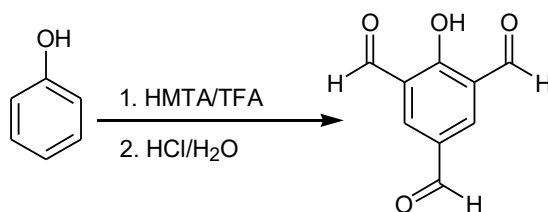

**Figure S1.** Preparation of 2-hydroxy-1,3,5-benzenetrialdehyde.

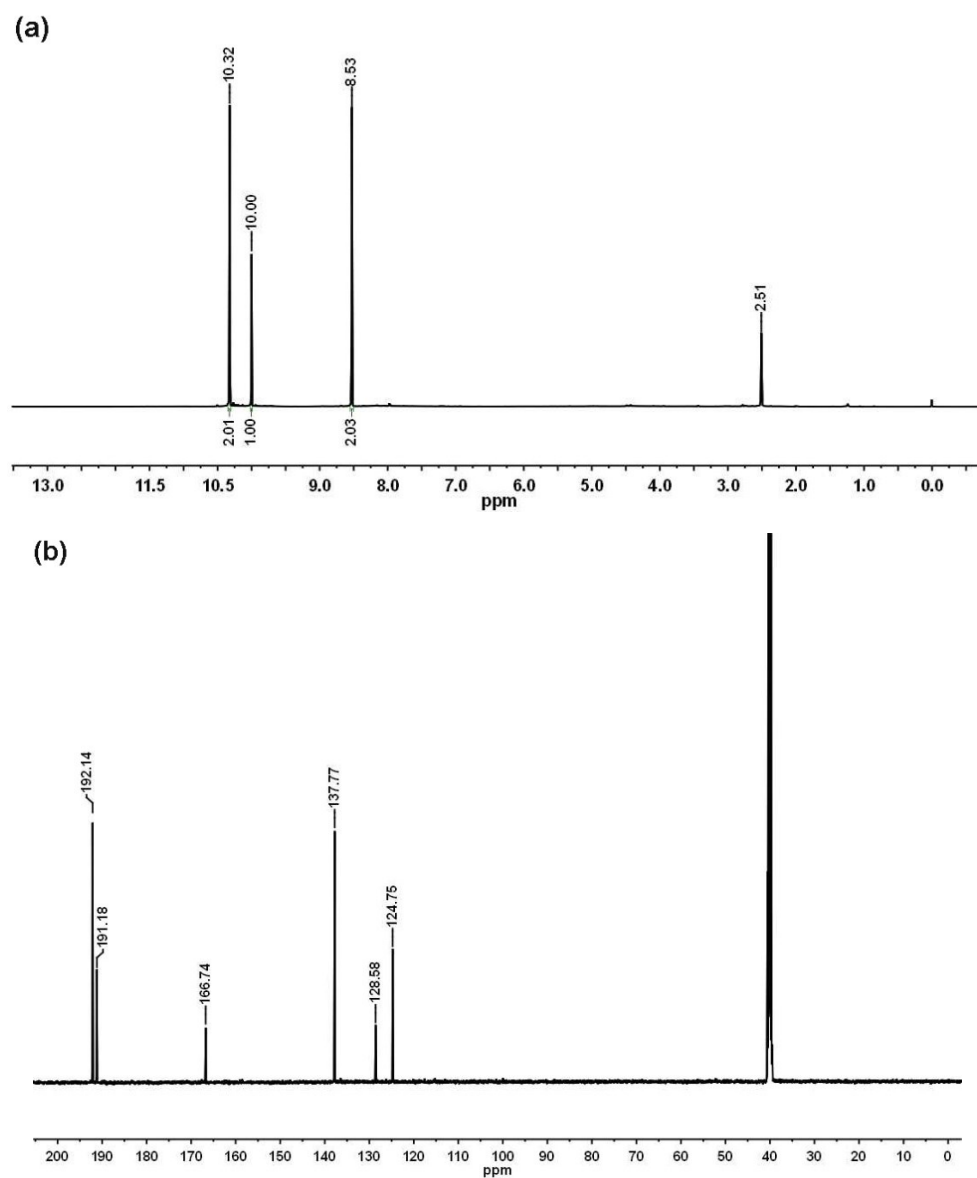

**Figure S2.** The NMR spectra of 2-hydroxy-1,3,5-benzenetrialdehyde: (a)  $^1\text{H}$  NMR; (b)  $^{13}\text{C}$  NMR.

| Racemates                        | This column                                                                         | Chiralcel AD-H column                                                                | Chiralpak OD-H column                                                                 |
|----------------------------------|-------------------------------------------------------------------------------------|--------------------------------------------------------------------------------------|---------------------------------------------------------------------------------------|
| 1-(1-Naphthyl)ethanol            | 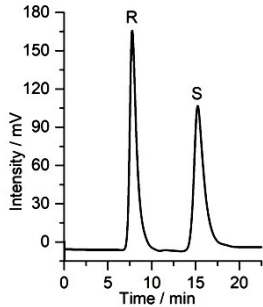   |    |    |
| 3-Benzyloxy-1,2-propanediol      |    |    |    |
| trans-1,2-Diphenylethylene oxide |  |  |  |
| 1-Phenyl-1-propanol              |  |  |  |

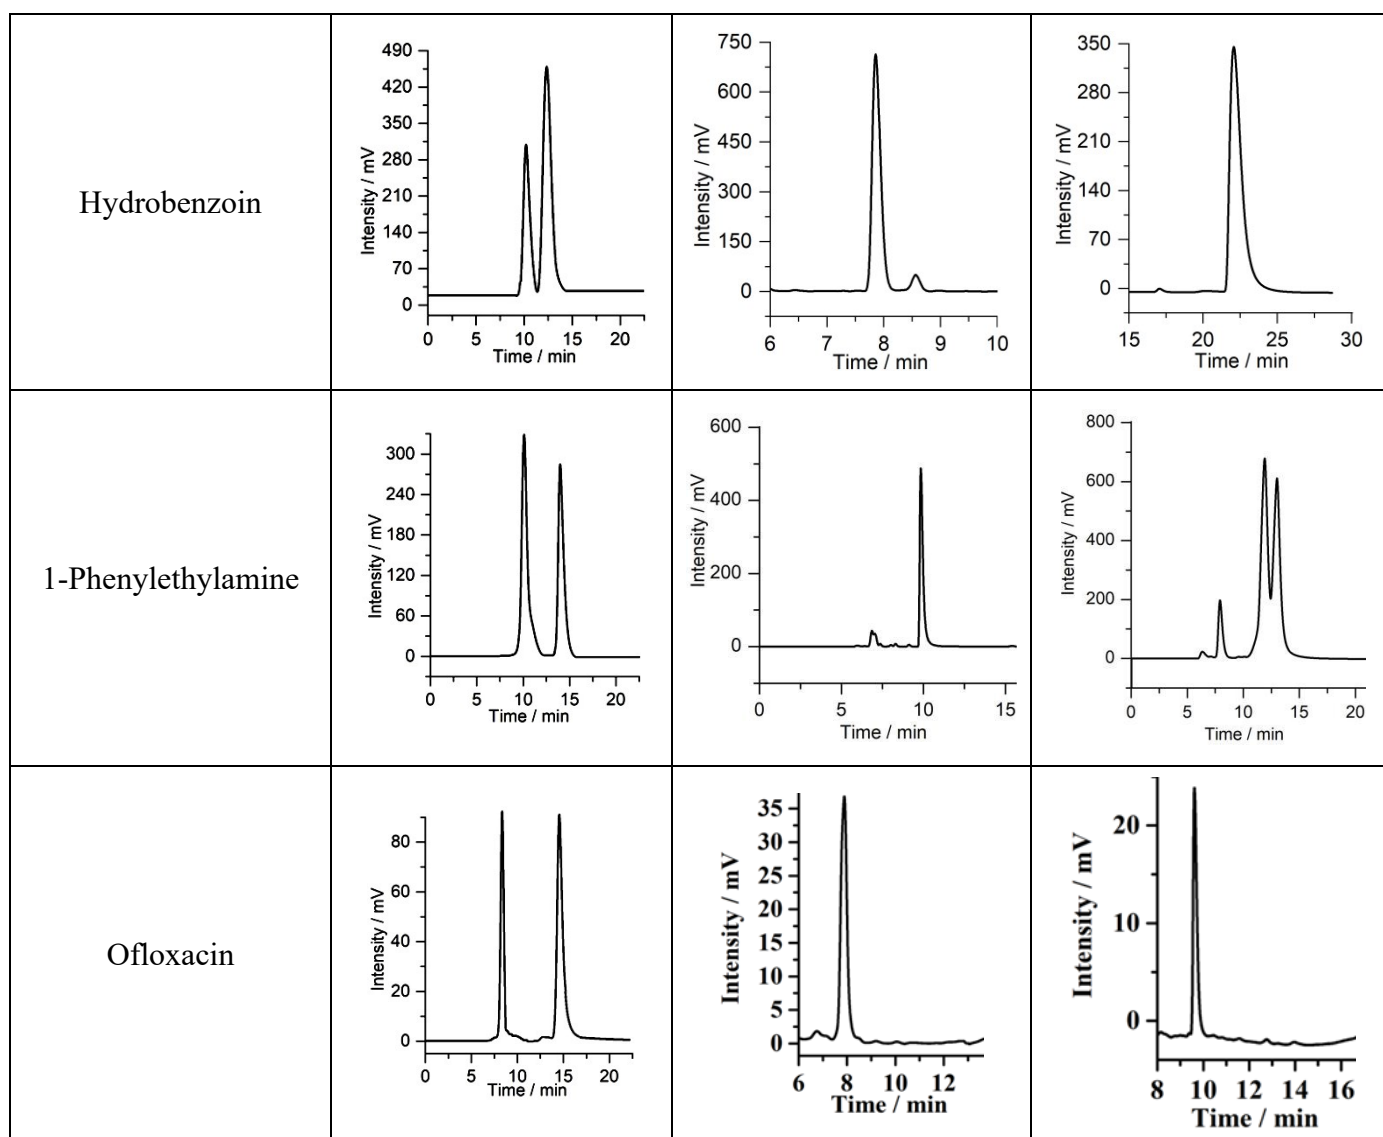

**Figure S3.** Comparison of the separation of some racemates on this POC-based column, Chiralcel AD-H column and Chiralpak OD-H column.

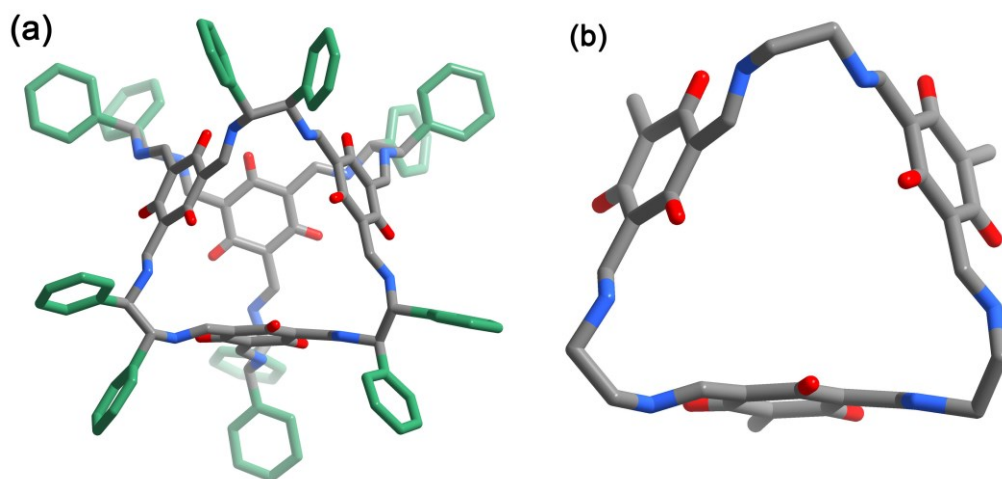

**Figure S4.** (a) Structure of the chiral POC molecule; (b) shape of the pore window on each face.

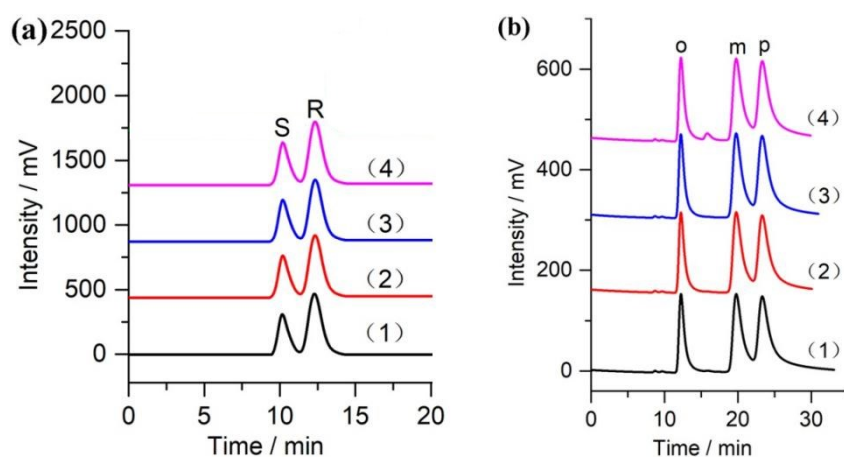

**Figure S5.** Chromatograms for the separation of (a) hydrobenzoin and (b) iodoaniline after the column were subjected to different injection times. (1)-(4): Chromatograms obtained after the column was undergone 10 injections, 100 injections, 200 injections, and 300 injections, respectively. Other chromatographic conditions are the same as those in Table 1 and Table 2.

**Table S1.** The results of elemental analysis of SiO<sub>2</sub>-SH and CSP.

| Analytes                                    | C %   | H %  | N %    |
|---------------------------------------------|-------|------|--------|
| Thiolated silica gel (SiO <sub>2</sub> -SH) | 3.34  | 0.87 | < 0.05 |
| CSP                                         | 13.95 | 1.67 | 0.92   |

## References

- [S1] Anderson, A.A.; Goetzen, T.; Shackelford, S.A.; Tsank, S.A. Convenient one-step synthesis of 2-hydroxy-1,3,5-benzenetricarbaldehyde. *Synthetic Commun.* **2000**, *30*, 3227-3232.
